# Supplementary material
Source: Springer Nature journal article supplement (https://www.springermedizin.de/resource/supplementary/12888_2012_1135_MOESM6_ESM.pdf/9479100)
Supplement: MOESM6 [file 9479100]

**Table 3. Factors associated with minimally adequate treatment for 915 respondents meeting DSM-IV MDE criteria nested in 65 clinics in the Dialogue Project in 2008**

|                                                                                                                                 | Model with level 1 factors only |      |             | Final model |      |             |
|---------------------------------------------------------------------------------------------------------------------------------|---------------------------------|------|-------------|-------------|------|-------------|
|                                                                                                                                 | Coefficient                     | OR   | 95% CI      | Coefficient | OR   | 95% CI      |
| <b>Individual characteristics</b>                                                                                               |                                 |      |             |             |      |             |
| Intercept                                                                                                                       | -0.72**                         | 0.49 | 0.31 - 0.78 | -1.34***    | 0.26 | 0.14 - 0.48 |
| Age                                                                                                                             |                                 |      |             |             |      |             |
| 18-24                                                                                                                           | -0.43                           | 0.65 | 0.4 - 1.05  | -0.50*      | 0.61 | 0.37 - 0.99 |
| 25-44 (ref)                                                                                                                     | -                               | 1.00 | -           | -           | 1.00 | -           |
| 45-64                                                                                                                           | -0.18                           | 0.83 | 0.61 - 1.13 | -0.20       | 0.82 | 0.60 - 1.11 |
| 65+                                                                                                                             | -1.33***                        | 0.27 | 0.14 - 0.52 | -1.45***    | 0.23 | 0.12 - 0.47 |
| Sex                                                                                                                             |                                 |      |             |             |      |             |
| Male                                                                                                                            | -0.06                           | 0.94 | 0.68 - 1.3  | -0.13       | 0.88 | 0.63 - 1.22 |
| Female (ref)                                                                                                                    | -                               | 1.00 | -           | -           | 1.00 | -           |
| Has a family physician                                                                                                          |                                 |      |             |             |      |             |
| Yes                                                                                                                             | 0.47*                           | 1.61 | 1.1 - 2.36  | 0.52**      | 1.68 | 1.14 - 2.48 |
| No (ref)                                                                                                                        | -                               | 1.00 | -           | -           | 1.00 | -           |
| Has a supplementary insurance coverage                                                                                          |                                 |      |             |             |      |             |
| Yes                                                                                                                             | 0.55***                         | 1.73 | 1.3 - 2.3   | 0.53***     | 1.70 | 1.27 - 2.27 |
| No (ref)                                                                                                                        | -                               | 1.00 | -           | -           | 1.00 | -           |
| At least one comorbid Anxiety Disorder                                                                                          |                                 |      |             |             |      |             |
| Yes                                                                                                                             | 0.58***                         | 1.8  | 1.35 - 2.39 | 0.58***     | 1.79 | 1.35 - 2.39 |
| No (ref)                                                                                                                        | -                               | 1.00 | -           | -           | 1.00 | -           |
| Severity of depressive symptoms (HADS depression sub-scale)                                                                     | 0.07***                         | 1.07 | 1.04 - 1.11 | 0.07***     | 1.07 | 1.04 - 1.11 |
| <b>Clinics characteristics</b>                                                                                                  |                                 |      |             |             |      |             |
| Psychotherapy available on-site                                                                                                 |                                 |      |             |             |      |             |
| Yes                                                                                                                             |                                 |      |             | 0.38*       | 1.46 | 1.06 - 2.02 |
| No (ref)                                                                                                                        |                                 |      |             | -           | 1.00 | -           |
| Number of GP using treatment algorithms with individuals suffering from anxiety or depressive disorders                         |                                 |      |             |             |      |             |
| All/Most                                                                                                                        |                                 |      |             | 0.40*       | 1.49 | 1.07 - 2.08 |
| None/Some (ref)                                                                                                                 |                                 |      |             | -           | 1.00 | -           |
| Inadequate mode of remuneration to offer an “optimal level” of care for patients suffering from anxiety or depressive disorders |                                 |      |             |             |      |             |
| Not at all / Slightly                                                                                                           |                                 |      |             | 0.46*       | 1.58 | 1.07 - 2.35 |
| Fairly                                                                                                                          |                                 |      |             | 0.29        | 1.33 | 0.91 - 1.95 |
| Highly (ref)                                                                                                                    |                                 |      |             | -           | 1.00 | -           |

\*  $p < 0.05$  \*\*  $p < 0.01$  \*\*\*  $p < 0.001$
